# Supplementary material
Source: PubMed Central journal article supplement (PMC2995669)
Supplement: supp_17.5.575_Magrabi_M3468R2_data_supplement_Appendix_A.pdf [file supp_17.5.575_Magrabi_M3468R2_data_supplement_Appendix_A.pdf]

## Appendix A: Calculating the complexity of prescribing tasks

Table 1: Complexity of prescribing tasks.

| Task type                                                                                                 | Task complexity: GOMS working memory changes* |         |      |
|-----------------------------------------------------------------------------------------------------------|-----------------------------------------------|---------|------|
|                                                                                                           | total                                         | average | peak |
| <b>SIMPLE:</b> Create new electronic medication chart. Enter allergy status and prescribe six medications | 214                                           | 9.4     | 12   |
| <b>COMPLEX:</b> Update existing medication chart. Replace two medications, prescribe two new medications  | 333                                           | 10.9    | 16   |

\*working memory changes generated by the GOMS model of prescribing

total= number of stores + number of replacements + number of deletions.

average= the integral of the number of items over time to execute task.

peak= peak working memory load (i.e. number of tags) during the execution of task.
