# Supplementary material
Source: PubMed Central journal article supplement (PMC2995669)
Supplement: supp_17.5.575_Magrabi_M3468R2_data_supplement_Appendix_B.pdf [file supp_17.5.575_Magrabi_M3468R2_data_supplement_Appendix_B.pdf]

## Appendix B: Interrupting tasks

### TASK X

Mrs Denning is an 80 year old woman with a chest infection. She has good renal function and has an IV line in. The registrar has asked you to put her on penicillin and metronidazole for aspiration pneumonia. However, she has serious penicillin allergy (facial swelling with penicillin). The registrar suggested clindamycin instead but she is not sure about the dosage.

Please use the Australian Medicines Handbook in Reference Viewer to check the appropriate dosage for the use of clindamycin for Mrs Denning.

Please indicate your answers by ticking the appropriate boxes:

Route:  PO

IM

IV

Dose:  100 – 400 mg

450 – 900 mg

950 – 1400 mg

Interval:  Every 4 hrs

Every 6 hrs

Every 8 hrs

Max. dose:  2.7g daily

4.8g daily

6.2g daily

**TASK Y**

Mr Morris is a 75 year old man who was admitted to hospital with a fever and UTI. The urine culture report indicates that Enterococcus sp is sensitive to both nitrofurantoin and ampi/amoxicillin. He has had empiric therapy for 3 days (c IV gentamicin and IV ceftriaxone) but needs to be discharged today.

He has good renal function for his age; Cr Clearance of ~70ml/min. However, he has a serious penicillin allergy (nasty rash with penicillin).

Please use the Australian Medicines Handbook in Reference Viewer to check the appropriate dosage for the use of nitrofurantoin for Mr. Morris.

Please indicate your answers by ticking the appropriate boxes:

Route:  PO

IM

IV

Dose:  50 – 100 mg

150 – 200 mg

250 – 300 mg

Duration:  3 days

9 days

14 days

Max. dose:  400 mg daily

600 mg daily

800 mg daily
