# Supplementary material
Source: PubMed Central journal article supplement (PMC2995669)
Supplement: supp_17.5.575_Magrabi_M3468R2_data_supplement_Appendix_C.pdf [file supp_17.5.575_Magrabi_M3468R2_data_supplement_Appendix_C.pdf]

## Appendix C: Screenshots of the CPOE user interface

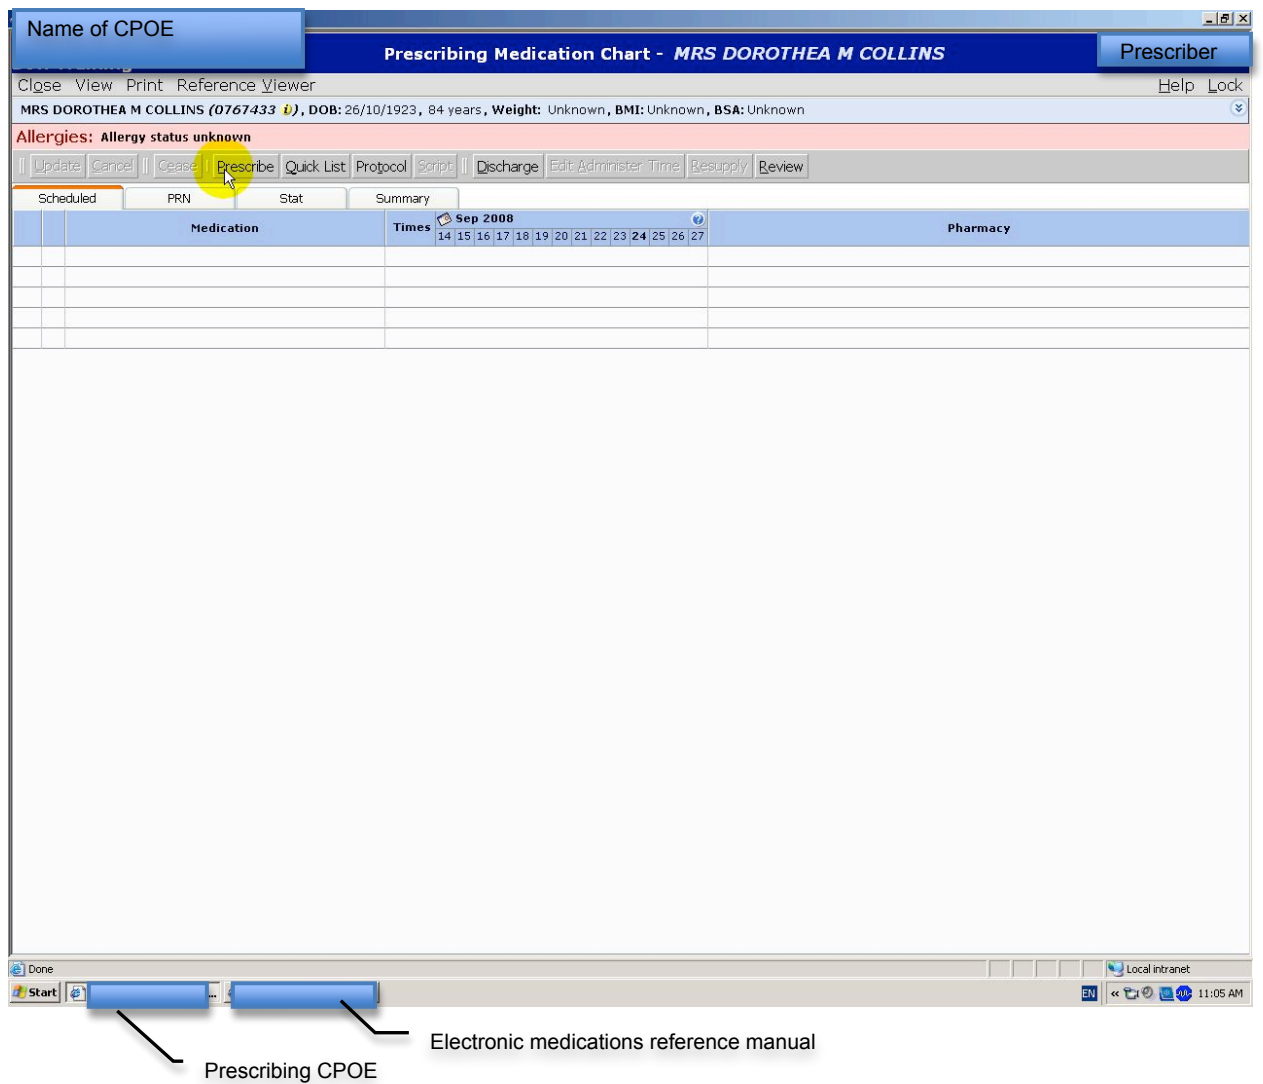

Figure 1: Screen shot of CPOE interface for creating a new medication chart (simple task).

**Name of CPOE** Prescribing Medication Chart - MR ARTHUR LINDSAY FOOTE Prescriber

Close View Print Reference Viewer Help Lock

MR ARTHUR LINDSAY FOOTE (0320768), DOB: 03/09/1933, 75 years, Weight: Unknown, BMI: Unknown, BSA: Unknown

Allergies: No known allergies or intolerances

Update Cancel Cease Prescribe Quick List Protocol Script Discharge Edit Administer Time Resupply Review

| Scheduled                | PRN | Stat | Summary                                                                                                                           | Times                                     | Pharmacy                                          |
|--------------------------|-----|------|-----------------------------------------------------------------------------------------------------------------------------------|-------------------------------------------|---------------------------------------------------|
|                          |     |      |                                                                                                                                   | Sep 2008                                  |                                                   |
|                          |     |      |                                                                                                                                   | 14 15 16 17 18 19 20 21 22 23 24 25 26 27 |                                                   |
| <input type="checkbox"/> |     |      | Naprosyn SR Tablet 1,000 mg<br>DOSE: 1000 mg Oral In the Morning                                                                  | 08:00                                     | New Medication Order<br>Give with food (AMH 2008) |
|                          |     |      | 24/09/2008                                                                                                                        |                                           |                                                   |
| <input type="checkbox"/> |     |      | Paracetamol (500mg) Tablet<br>DOSE: 1000 mg Oral Four Times Daily<br>(2 x 500mg) Maximum 8 tablets containing Paracetamol per day | 06:00<br>12:00<br>18:00<br>22:00          | New Medication Order                              |
|                          |     |      | 24/09/2008                                                                                                                        |                                           |                                                   |
| <input type="checkbox"/> |     |      | Perindopril (5mg) Tablet<br>DOSE: 5 mg Oral Once Daily                                                                            | 08:00                                     | New Medication Order                              |
|                          |     |      | 24/09/2008                                                                                                                        |                                           |                                                   |
| <input type="checkbox"/> |     |      | Ranitidine (150mg) Tablet<br>DOSE: 150 mg Oral Twice Daily                                                                        | 08:00<br>20:00                            | New Medication Order                              |
|                          |     |      | 24/09/2008                                                                                                                        |                                           |                                                   |
| <input type="checkbox"/> |     |      | Simvastatin (40mg) Tablet<br>DOSE: 40 mg Oral Nocte                                                                               | 20:00                                     | New Medication Order                              |
|                          |     |      | 24/09/2008                                                                                                                        |                                           |                                                   |
| <input type="checkbox"/> |     |      | Temazepam (10mg) Tablet<br>DOSE: 10 mg Oral Nocte                                                                                 | 20:00                                     | New Medication Order                              |
|                          |     |      | 24/09/2008                                                                                                                        |                                           |                                                   |

Start Local Intranet 11:19 AM

Figure 2: Screen shot of CPOE interface for updating an existing medication chart (complex task).
