# Supplementary material
Source: PubMed Central journal article supplement (PMC2995669)
Supplement: supp_17.5.575_Magrabi_M3468R2_data_supplement_Appendix_D.pdf [file supp_17.5.575_Magrabi_M3468R2_data_supplement_Appendix_D.pdf]

## **Appendix D: CPOE use and demographic information**

Following written informed consent, doctors were asked to (1) indicate their frequency of use of the CPOE for electronic prescribing on a six-point scale (never, once a month, two to three times per month, once a week, two to six times per week, every day), (2) rate their computer skills in using the CPOE for electronic prescribing on a five-point scale (poor, fair, good, very good, excellent), (3) report their experience of using the CPOE for electronic prescribing on a six-point scale (less than three months, three to six months, six to nine months, nine to twelve months, one to two years, more than two years), (4) indicate their years of clinical experience on a five-point scale (less than two years, two to five years, six to ten years, eleven to nineteen years, twenty or more years), and (5) indicate their age and gender.
