# Supplementary material
Source: PubMed Central journal article supplement (PMC2995669)
Supplement: supp_17.5.575_Magrabi_M3468R2_data_supplement_Appendix_E.pdf [file supp_17.5.575_Magrabi_M3468R2_data_supplement_Appendix_E.pdf]

## Appendix E: Calculating opportunities for error in using CPOE for electronic prescribing

### SCENARIO A

Mrs. Dorothea M Collins is a 84 year old woman who was admitted early this morning to the hospital (in W ward). She has hypertension, controlled atrial fibrillation and presented with acute pulmonary oedema. Her observations are stable, and she doesn't have any chest pain.

Following the consultant ward round this morning, you now need to chart her medications.

Please use the long hand method (not the 'Quick List') to prescribe her medications.

*Paper Chart for Scenario A:*

*mimvastatin 80mg PO daily at 2200*

*metoprolol 50mg PO twice a day - 0800 and 2000*

*frusemide 40mg PO twice a day - 0800 and 1200*

*aspirin 150mg PO daily 0800*

*amiodarone 200mg PO three times a day – 0800, 1400 and 2000*

*lisinopril 5mg PO daily at 2000*

NB: allergy status available on paper chart "Nil known".

Table 1: Error opportunities in Scenario A.

| Prescribing error type        | Critical subtask/ interaction with CPOE     | Error opportunities |
|-------------------------------|---------------------------------------------|---------------------|
| Wrong patient                 | Wrong item selected from CPOE list          | 1                   |
| Missed allergy                | Failure to enter allergy information        | 1                   |
| Wrong medication              | Wrong item selected from CPOE list          | 6                   |
| Incorrect dose                | Wrong item selected from CPOE list          | 6                   |
| Incorrect route               | Wrong item selected from CPOE dropdown list | 6                   |
| Wrong formulation             | Wrong selection from CPOE list              | 6                   |
| Incorrect administration time | Failure to change default time              | 10                  |
| Incorrect frequency           | Wrong item selected from CPOE dropdown list | 6                   |
| Medication omission           | Failure to prescribe medication             | 6                   |
| Date error                    | Failure to change default date              | 6                   |
| <b>Total</b>                  |                                             | <b>54</b>           |

As shown in Table 1 there are 54 opportunities for error in Scenario A.
